# Supplementary material
Source: PubMed Central journal article supplement (PMC8487925)
Supplement: NIHMS1712985-supplement-Suppl__Material.pdf [file NIHMS1712985-supplement-Suppl__Material.pdf]

## SUPPLEMENTAL MATERIAL.

### Supplemental Results S1. Partial repeat of Experiment 1 on *D. seguieri*.

**Additional methodological details:** The final sample size of the *D. seguieri* treatment in Experiment 1 was small, we therefore repeated it with a subset of 10 of the 19 isolates used in the full Experiment 1 inoculation trail (See Table S1 below). We also inoculated a smaller number of *D. pavonius* plants at the same time, but only 23 of these flowered and could be scored for disease, so we did not analyze the results further (infections occurred in all *D. pavonius* treatments except Lineage 2 where only two plants flowered).

**Table S1** Number of *D. seguieri* and *D. pavonius* plants that flowered and were scored for disease in the partial repeat of Experiment 1.

|                     |                        | <b>Lineage 1</b> | <b>Lineage 2</b> | <b>Lineage 3</b> | <b>Lineage 4</b> |
|---------------------|------------------------|------------------|------------------|------------------|------------------|
| <b>Host species</b> | <b>Host population</b> | (6,7)            | (2,3, 13, 15)    | (9,10)           | (11, 17,20)      |
| <i>D. seguieri</i>  | Val Maira              | 93               | 187              | 52               | 112              |
|                     | Valle Corsaglia        | 42               | 76               | 18               | 70               |
| <i>D. pavonius</i>  | Valle Pesio            | 9                | 2                | 3                | 9                |

### Supplemental material S2.

**Table S2.** Effect of host species treatment and pathogen lineage on infection success in Experiment 1 when isolates 12 and 15 (potential hybrids) were excluded from the analysis.

| <b>Source</b>    | <b>Chi<sup>2</sup> Deviance</b> | <b>df</b> | <b>p</b> |
|------------------|---------------------------------|-----------|----------|
| Host species     | 154.52                          | 2         | <0.000 1 |
| Pathogen Lineage | 9.003                           | 3         | 0.0292   |
| Host*Lineage     | 34.45                           | 6         | <0.0001  |

**Supplemental Results S3. Comparing the infection rates between populations within host species in Experiment 1.**

**A)** Results of overall test for host population (across all lineages). For *D. pavonius* and *D. seguieri* the test statistic is from a mixed model that included pathogen isolate. For *D. furcatus*, a simple fisher-exact test was used, by summing across lineages. **B)** Results of individual fisher exact tests examining the variation between host populations from the same species infected by the same pathogen lineage.

A)

| Host species       | Population      | D   | H  | test-statistic | p     |
|--------------------|-----------------|-----|----|----------------|-------|
| <i>D. pavonius</i> | Valle Pesio     | 168 | 13 | 1.115          | 1     |
|                    | Ferrere         | 78  | 15 |                |       |
| <i>D. seguieri</i> | Val Maira       | 23  | 44 | 0.705          | 0.401 |
|                    | Valle Corsaglia | 24  | 16 |                |       |
| <i>D. furcatus</i> | Alberghi        | 2   | 16 | 2.68           | 0.012 |
|                    | Valle Grana     | 2   | 17 |                |       |

B)

| Host species       | Host. Pop.      | Lineage         | Num. Diseased | Number Healthy | Fisher odds ratio | p    |
|--------------------|-----------------|-----------------|---------------|----------------|-------------------|------|
| <i>D. pavonius</i> | Valle Pesio     | L1              | 27            | 3              | 1.37              | 1    |
|                    |                 | Ferrere         | 13            | 2              |                   |      |
|                    | Valle Pesio     | L2              | 75            | 6              | 2.98              | 0.11 |
|                    |                 | Ferrere         | 29            | 7              |                   |      |
|                    | Valle Pesio     | L3              | 16            | 1              | 8.59              | 0.08 |
|                    |                 | Ferrere         | 5             | 3              |                   |      |
| Valle Pesio        | L4              | 50              | 3             | 0.67           | 0.67              |      |
|                    | Ferrere         | 31              | 3             |                |                   |      |
| <i>D. seguieri</i> | Val Maira       | L1              | 0             | 8              | 0                 | 1    |
|                    |                 | Valle Corsaglia | 0             | 2              |                   |      |
|                    | Val Maira       | L2              | 22            | 7              | 0.46              | 0.32 |
|                    |                 | Valle Corsaglia | 21            | 3              |                   |      |
|                    | Val Maira       | L3              | 0             | 3              | 0                 | 1    |
|                    |                 | Valle Corsaglia | 1             | 6              |                   |      |
| Val Maira          | L4              | 1               | 26            | 0.11           | 0.10              |      |
|                    | Valle Corsaglia | 2               | 5             |                |                   |      |
| <i>D. furcatus</i> | Alberghi        | L1              | 0             | 3              | 0                 | 1    |
|                    |                 | Valle Grana     | 0             | 3              |                   |      |
|                    | Alberghi        | L2              | 2             | 3              | 1.85              | 1    |
|                    |                 | Valle Grana     | 1             | 3              |                   |      |
|                    | Alberghi        | L3              | 0             | 2              | 0                 | 1    |
|                    |                 | Valle Grana     | 1             | 3              |                   |      |
| Alberghi           | L4              | 0               | 8             | 0              | 1                 |      |
|                    | Valle Grana     | 0               | 8             |                |                   |      |

**Supplemental Results S4. Variation among pathogen isolates within Lineages.**

We were able to carry out two contrasts to compare the effect of isolate locality while holding lineage and host-of-origin constant. We found no significant effect of location among isolates of Lineage 2 that had been collected from *D. seguieri* in either Val Maira or Rio Freddo ( $F=2.15$ ,  $df=1$   $p=0.1519$ ). Similarly, there was no effect of location among isolates of Lineage 4 from *D. seguieri* collected from either San Bernardo di Mendatica or Lago di Osiglia ( $F=7.587$ ,  $df=1$ ,  $p=0.387$ ).

Eight pairs of replicate *Microbotryum* isolates were assigned to the same lineage and collected from the same host-of-origin and location. After correcting for multiple comparisons, none of these pairs showed evidence of significant variation in overall infection rate (Table S4 below).

**Table S4.** Results of Fisher-exact tests comparing the infection rate between replicate pairs of strains from the same pathogen lineage and geographic location in experiment 1.

| Lineage | Pathogen strain | Total Number | Number Diseased | Fisher-exact test |
|---------|-----------------|--------------|-----------------|-------------------|
| 1       | 7               | 18           | 8               | 0.3022            |
|         | 8               | 21           | 18              |                   |
| 2       | 3               | 28           | 20              | 0.8348            |
|         | 4               | 24           | 19              |                   |
| 2       | 13              | 19           | 14              | 0.8116            |
|         | 14              | 19           | 16              |                   |
| 2       | 15              | 32           | 28              | 1.0               |
|         | 16              | 28           | 24              |                   |
| 3       | 9               | 25           | 14              | 1.0               |
|         | 10              | 18           | 9               |                   |
| 4       | 11              | 28           | 13              | 0.6467            |
|         | 12              | 26           | 16              |                   |
| 4       | 17              | 27           | 20              | 1.0               |
|         | 18              | 25           | 17              |                   |
| 4       | 19              | 11           | 2               | 0.0947            |
|         | 20              | 20           | 16              |                   |

**Supplemental Results S5. Variation in flowering rates between inoculated and control plants.**

A total of 420 (out of 735) inoculated plants and 69 control plants (out of 179) flowered in the first year of the experiment. Two out of the *D. pavonius* control plants were infected, but none of the other two species had infected controls. Flowering rates in the first year differed significantly among host species ( $X^2=97.90$ ,  $p<0.0001$ ) and between control and inoculated treatments ( $X^2=20.03$ ,  $df=1$ ,  $p<0.0001$ ). The flowering rate was highest in *D. pavonius* (69%) and lowest in *D. furcatus* (24%). In *D. pavonius*, the flowering rate was higher among inoculated plants (71%) than among control plants (57%;  $X^2=3.56$ ,  $p=0.06$ ). There was a similar trend of higher flowering in the inoculated treatment of *D. seguieri* (53% versus 38%) but the effect was not significant ( $X^2=1.52$ ,  $p=0.22$ ). Pathogen lineage did not have a significant effect on flowering rate in any species (results not shown).

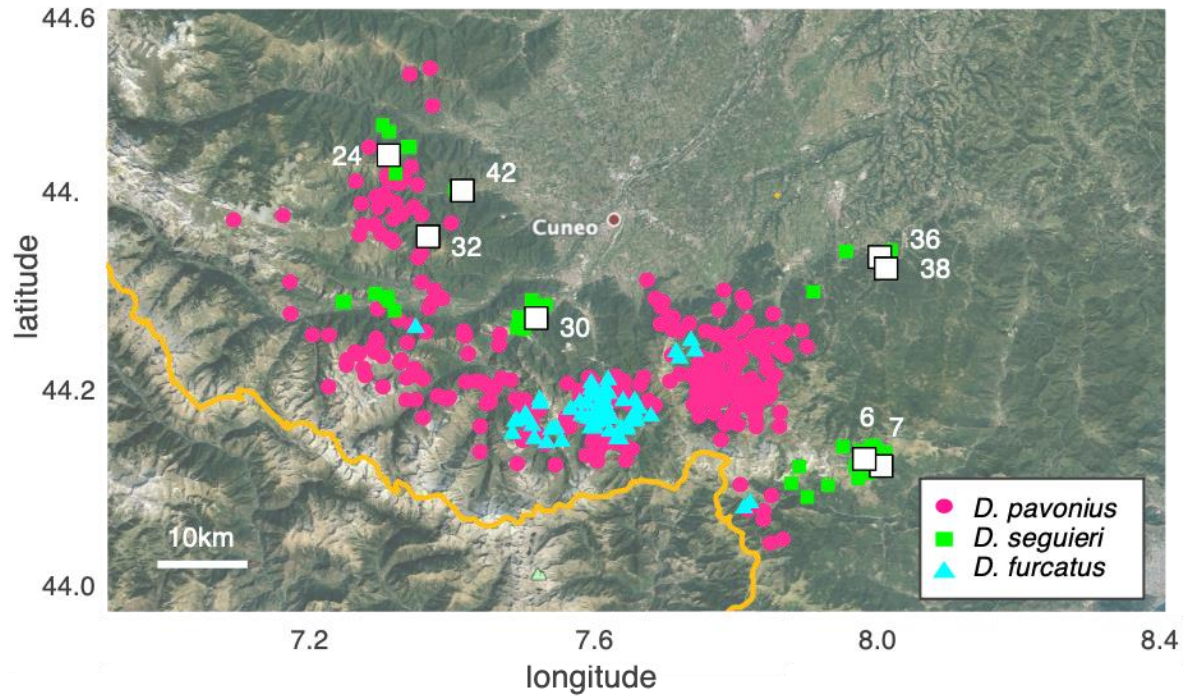

**Fig. S1.** Location of eight additional *D. seguieri* host populations sampled for Experiment 2 (White numbered boxes). The distribution of the three host species is shown for reference. Points have been randomly jittered to minimize overlap. The yellow line indicates the border with France.

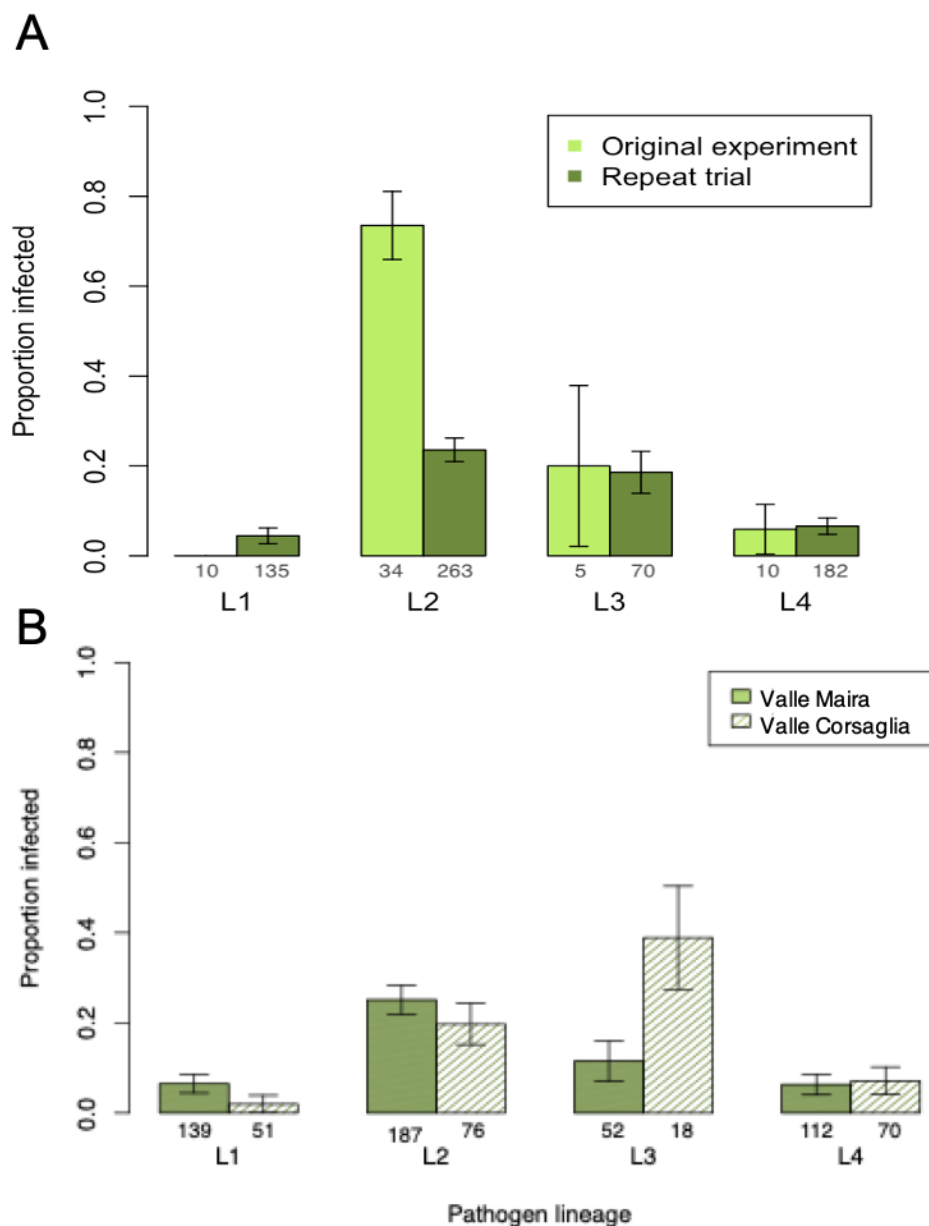

**Figure S2.** A) Comparison of infectivity of four pathogen lineages on *D. seguieri* in the original inoculation experiment (light green bars) and the repeat inoculation experiment (dark green bars). For consistency, the infection rates for the original experiment shown above (light green bars) were calculated using only the subset of 10 isolates that were used in the repeat inoculation trial. B) The variation in infection rate among the two *D. seguieri* population in the partial repeat experiment of Experiment 1. In both A and B numbers indicate sample size and error bars are 1 SEM.

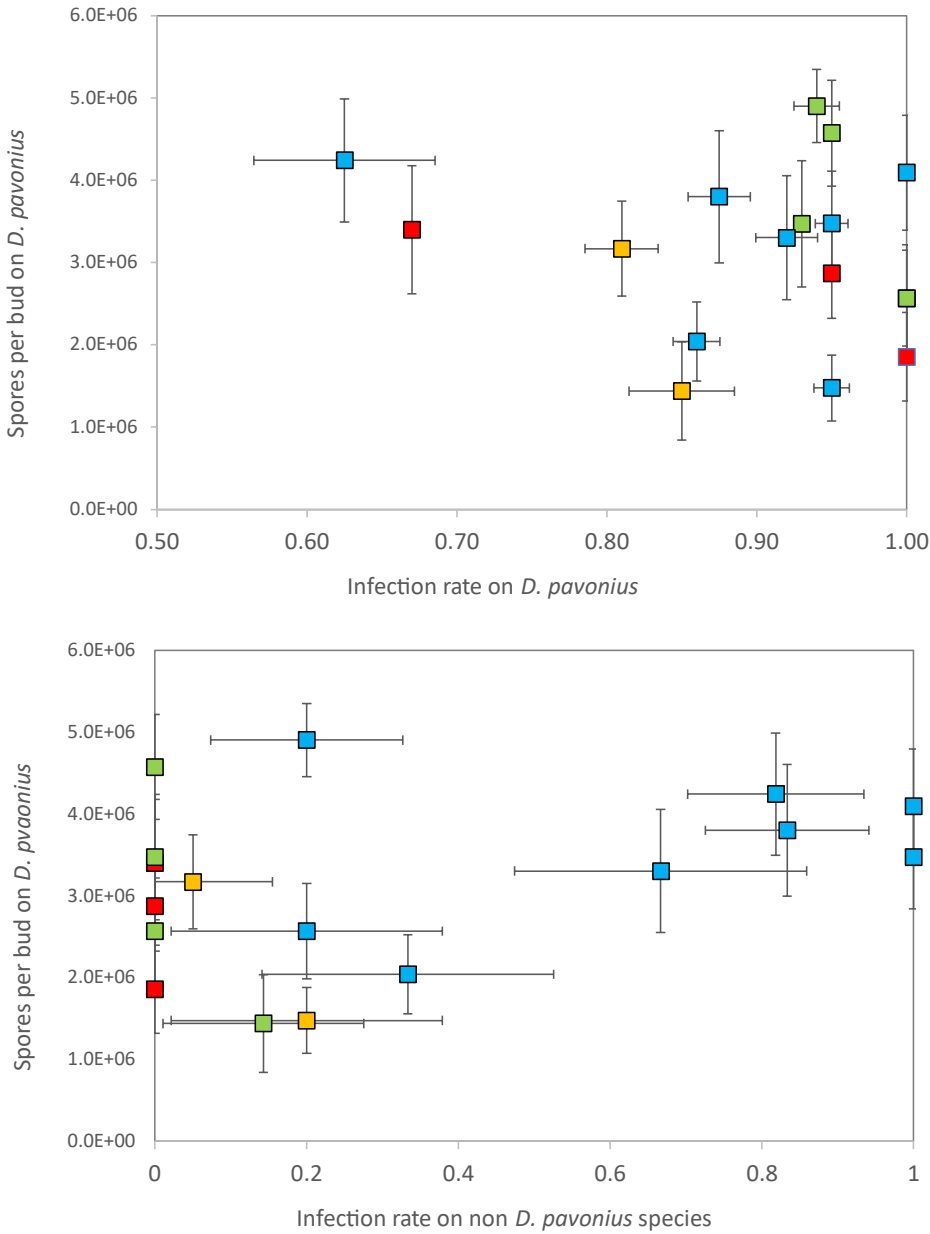

**Fig S3.** Relationship between infection rate on **Top)** *Dianthus pavonius* and **Bottom)** Other *Dianthus* species (not *D. pavonius*), and average spore production on *D. pavonius*. Each square is an individual *Microbotryum* isolate. Colors indicate lineage: Red-L1, Blue-L2, Yellow-L3, and Green-L4. Error bars are 1 SEM. Note that the x-axis starts at 0.5 in the top plot because all isolates were highly infectious on *D. pavonius*. We did not find any evidence of a significant negative relationship that would indicate a trade-off between infectivity and spore production (see main text for details).
